# Supplementary material
Source: publisher site journal article supplement (https://www.spandidos-publications.com/1855/downloadSupplementary)

Figure S1. Lymphocytic molecular markers of SSP cells. (A) Unstained SSP cells of CD3, CD5, CD8, CD56, CD16, Granzyme B and Perforin were analyzed by FCM for the negative control. (B) The NK cell surface markers of SSP cells were authenticated CD3-, CD5-, CD8-, CD56+, CD16-, Granzyme B+ and Perforin+ by using associated antibodies to verify its origin. SSP, side population cells-SNK-6/ADM-SP.

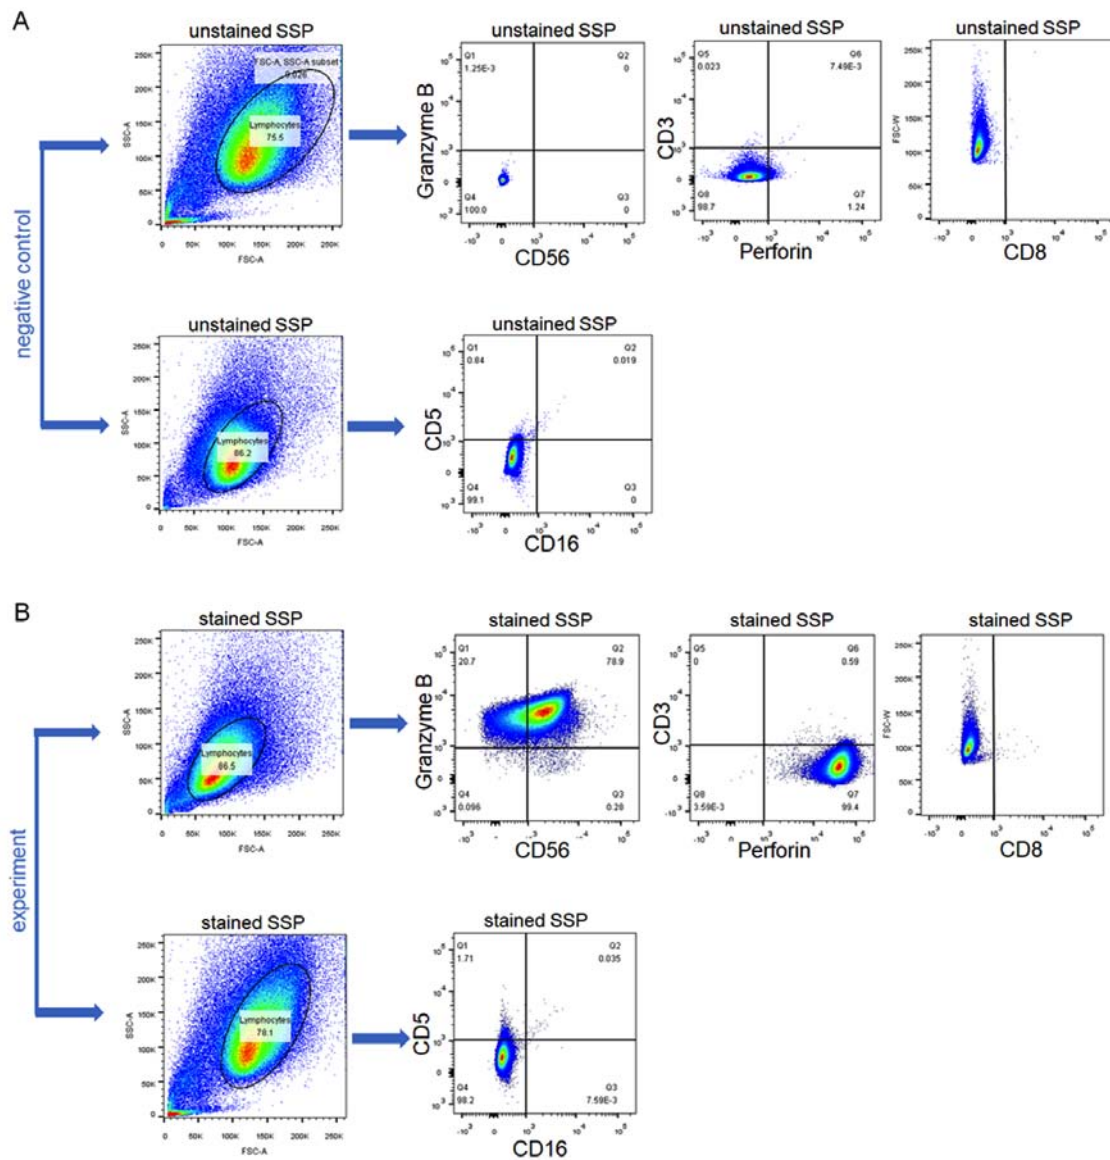

Supplement: Supplementary file 1 [file downloadSupplementary]
